# Supplementary material for: Soil organic carbon stocks did not change after 130 years of afforestation on a former Swiss Alpine pasture
Source: Copernicus journal article supplement (doi:10.5194/egusphere-2023-645), 2023-05-08
Supplement: Supplementary file 1 [file egusphere-2023-645-supplement.pdf]

Supplementary Table 1. Bulk density of mineral soil samples (n= 5 for pasture; n= 3 for forest). Values are average  $\pm$  SE (\*\*Average  $\pm$  SE of the individual plots; n= 5 for pasture; n= 3 for forest).

| Mineral soil | Bulk density [g cm <sup>-3</sup> ] |                 |                 |                 |
|--------------|------------------------------------|-----------------|-----------------|-----------------|
|              | Pasture                            | Forest          |                 |                 |
|              |                                    | 40-year-old     | 55-year-old     | 130-year-old    |
| 0-5cm        | 0.87 $\pm$ 0.04                    | 0.76 $\pm$ 0.02 | 0.83 $\pm$ 0.09 | 0.86 $\pm$ 0.04 |
| 5-10cm       | 0.95 $\pm$ 0.03                    | 0.86 $\pm$ 0.03 | 0.90 $\pm$ 0.07 | 0.83 $\pm$ 0.07 |
| 10-15cm      | 1.00 $\pm$ 0.02                    | 1.04 $\pm$ 0.01 | 1.04 $\pm$ 0.02 | 1.04 $\pm$ 0.04 |
| 15-20cm      | 1.05 $\pm$ 0.04                    | 1.11 $\pm$ 0.04 | 1.11 $\pm$ 0.06 | 1.14 $\pm$ 0.02 |
| 20-25cm      | 1.12 $\pm$ 0.03                    | 1.17 $\pm$ 0.03 | 1.11 $\pm$ 0.04 | 1.19 $\pm$ 0.03 |
| 25-30cm      | 1.12 $\pm$ 0.03                    | 1.28 $\pm$ 0.00 | 1.17 $\pm$ 0.04 | 1.25 $\pm$ 0.05 |
| 30-35cm      | 1.15 $\pm$ 0.04                    | 1.22 $\pm$ 0.00 | 1.22 $\pm$ 0.02 | 1.26 $\pm$ 0.04 |
| 35-40cm      | 1.14 $\pm$ 0.06                    | 1.20 $\pm$ 0.00 | 1.24 $\pm$ 0.01 | 1.21 $\pm$ 0.05 |
| 40-45cm      | 1.16 $\pm$ 0.06                    | 1.18 $\pm$ 0.00 | 1.19 $\pm$ 0.03 | 1.23 $\pm$ 0.02 |
| **Average    | 1.05 $\pm$ 0.02                    | 1.08 $\pm$ 0.04 | 1.09 $\pm$ 0.03 | 1.10 $\pm$ 0.03 |

Supplementary Table 2. Vegetation composition of each forest stand age (40-, 55-, and 130-years-old) obtained during field work per one Ar [A-1].

|                            | Canopy cover [%] | Individual living spruce trees [A <sup>-1</sup> ] | Individual dead spruce trees [A <sup>-1</sup> ] | Individual broadleaf trees [A <sup>-1</sup> ] |
|----------------------------|------------------|---------------------------------------------------|-------------------------------------------------|-----------------------------------------------|
| <b>40-year-old forest</b>  | 58 $\pm$ 5       | 44 $\pm$ 10                                       | 1 $\pm$ 1                                       | 1 $\pm$ 0                                     |
| <b>55-year-old forest</b>  | 48 $\pm$ 3       | 18 $\pm$ 2                                        | 6 $\pm$ 1                                       | 4 $\pm$ 1                                     |
| <b>130-year-old forest</b> | 65 $\pm$ 5       | 13 $\pm$ 0                                        | 2 $\pm$ 1                                       | 8 $\pm$ 4                                     |

Supplementary Table 3. Composition of the Oi horizon of each forest age (40-, 55-, and 130-years-old; n.a. = not available).

| Residues [mass - %]          | 40-year-old forest | 55-year-old forest | 130-year-old forest |
|------------------------------|--------------------|--------------------|---------------------|
| <b>Wood and twigs</b>        | 24.0               | 16.4               | 16.2                |
| <b>Spruce cones</b>          | 32.5               | 64.3               | 58.2                |
| <b>Spruce needles</b>        | 24.5               | 3.9                | 7.5                 |
| <b>Moss</b>                  | 1.2                | n.a.               | 0.2                 |
| <b>Grass residues</b>        | n.a.               | n.a.               | 2.3                 |
| <b>Arbuscular mycorrhiza</b> | 4.3                | n.a.               | n.a.                |

Supplementary Table 4. Root biomass and root frequency (counted in the field) of pasture and forest areas (40-, 55-, and 130-years old). Values are mean values  $\pm$  SE (n= 5 for pasture; n= 3 for forest, \* Sum  $\pm$  SE (0-45cm) (n.a. = not available).

|              | Fine (0-2mm) root biomass [g m <sup>-2</sup> ] |                     |                     |                     | Coarse (2-5mm) root biomass [g m <sup>-2</sup> ] |                     |                     |                     |
|--------------|------------------------------------------------|---------------------|---------------------|---------------------|--------------------------------------------------|---------------------|---------------------|---------------------|
|              |                                                | Forest              |                     |                     |                                                  | Forest              |                     |                     |
| Mineral soil | Pasture                                        | 40-year-old         | 55-year-old         | 130-year-old        | Pasture                                          | 40-year-old         | 55-year-old         | 130-year-old        |
| 0-5cm        | 87.7 $\pm$ 26.9                                | 1.3 $\pm$ 0.4       | 1.4 $\pm$ 0.4       | 0.7 $\pm$ 0.2       | 55.2 $\pm$ 20.9                                  | 225.4 $\pm$ 62.9    | 135.6 $\pm$ 21.5    | 178.1 $\pm$ 81.1    |
| 5-10cm       | 27.2 $\pm$ 10.5                                | 4.8 $\pm$ 3.6       | 0.4 $\pm$ 0.3       | 2.9 $\pm$ 1.9       | 197.9 $\pm$ 183.0                                | 117.0 $\pm$ 32.1    | 78.3 $\pm$ 15.0     | 222.3 $\pm$ 61.1    |
| 10-15cm      | 19.6 $\pm$ 3.6                                 | 4.6 $\pm$ 1.9       | 0.9 $\pm$ 0.8       | 3.4 $\pm$ 3.1       | 189.0 $\pm$ 131.5                                | 74.8 $\pm$ 17.5     | 40.3 $\pm$ 10.8     | 77.4 $\pm$ 26.7     |
| 15-20cm      | 38.0 $\pm$ 23.1                                | 2.2 $\pm$ 1.2       | n.a.                | 3.3 $\pm$ 2.6       | 5.8                                              | 87.5 $\pm$ 58.8     | 59.3 $\pm$ 7.6      | 80.4 $\pm$ 61.9     |
| 20-25cm      | 3.5 $\pm$ 0.9                                  | 2.5 $\pm$ 1.5       | 0.1                 | 0.2 $\pm$ 0.1       | 27.8                                             | 15.6 $\pm$ 3.8      | 13.7 $\pm$ 2.9      | 18.0 $\pm$ 11.9     |
| 25-30cm      | 4.3 $\pm$ 0.9                                  | 0.5 $\pm$ 1.2       | 0.1                 | 1.1 $\pm$ 0.6       | 27.4 $\pm$ 22.1                                  | 59.8 $\pm$ 18.7     | 16.8 $\pm$ 9.1      | 13.3 $\pm$ 6.4      |
| 30-35cm      | 3.5 $\pm$ 1.2                                  | 0.4 $\pm$ 0.0       | n.a.                | 0.9 $\pm$ 0.4       | 96.8                                             | 34.6 $\pm$ 3.8      | 4.8 $\pm$ 0.2       | 32.3 $\pm$ 17.5     |
| 35-40cm      | 1.4 $\pm$ 0.4                                  | 0.3                 | n.a.                | 1.0 $\pm$ 0.1       | n.a.                                             | 16.7 $\pm$ 0.1      | 2.8 $\pm$ 0.9       | 36.0 $\pm$ 11.9     |
| 40-45cm      | 1.7 $\pm$ 0.6                                  | n.a.                | n.a.                | 1.1 $\pm$ 0.8       | n.a.                                             | 22.2 $\pm$ 10.5     | 4.1 $\pm$ 2.6       | 34.0 $\pm$ 22.7     |
| *Sum         | 184.9 $\pm$ 39.5                               | 16.1 $\pm$ 6.1      | 2.9 $\pm$ 1.4       | 12.1 $\pm$ 7.5      | 274.2 $\pm$ 209.2                                | 640.7 $\pm$ 140.4   | 349.5 $\pm$ 31.3    | 683.5 $\pm$ 202.1   |
|              | Fine (0-2mm) root frequency [m <sup>-2</sup> ] |                     |                     |                     | Coarse (2-5mm) root frequency [m <sup>-2</sup> ] |                     |                     |                     |
|              |                                                | Forest              |                     |                     |                                                  | Forest              |                     |                     |
| Mineral soil | Pasture                                        | 40-year-old         | 55-year-old         | 130-year-old        | Pasture                                          | 40-year-old         | 55-year-old         | 130-year-old        |
| 0cm          | 7'478.4 $\pm$ 1'150.6                          | 1'924.0 $\pm$ 285.2 | 880.0 $\pm$ 36.7    | 845.3 $\pm$ 201.6   | n.a.                                             | 717.3 $\pm$ 22.8    | 870.7 $\pm$ 264.7   | 334.7 $\pm$ 116.9   |
| 10cm         | 5'079.2 $\pm$ 736.5                            | 854.7 $\pm$ 212.5   | 541.3 $\pm$ 121.8   | 910.7 $\pm$ 141.6   | n.a.                                             | 438.7 $\pm$ 22.5    | 366.7 $\pm$ 67.7    | 545.3 $\pm$ 61.5    |
| 20cm         | 2'991.2 $\pm$ 759.9                            | 610.7 $\pm$ 22.7    | 368.0 $\pm$ 49.1    | 469.3 $\pm$ 89.3    | n.a.                                             | 276.0 $\pm$ 22.8    | 233.3 $\pm$ 58.3    | 320.0 $\pm$ 22.8    |
| 30cm         | 1'229.6 $\pm$ 339.0                            | 436.0 $\pm$ 80.9    | 129.3 $\pm$ 2.2     | 346.7 $\pm$ 87.7    | n.a.                                             | 310.7 $\pm$ 42.5    | 141.3 $\pm$ 19.4    | 264.0 $\pm$ 60.7    |
| 40cm         | 1'729.0 $\pm$ 814.5                            | 1'646.0             | 98.7 $\pm$ 23.3     | 68.0 $\pm$ 13.2     | n.a.                                             | 628.0 $\pm$ 202.7   | 88.0 $\pm$ 22.3     | 168.0 $\pm$ 42.8    |
| *Sum         | 15'761.3 $\pm$ 4'422.4                         | 5'320.0 $\pm$ 623.8 | 2'017.3 $\pm$ 151.3 | 2'640.0 $\pm$ 504.9 | n.a.                                             | 2'370.7 $\pm$ 225.6 | 1'700.0 $\pm$ 377.9 | 1'632.0 $\pm$ 260.8 |
